# Supplementary material for: Trivalent cation-induced phase separation in proteins: ion specific contribution in hydration also counts
Source: Royal Society of Chemistry journal article supplement (doi:10.1039/d2cp01061e), 2022-01-01
Supplement: d2cp01061e1.pdf [file d2cp01061e1.pdf]

*Supporting information for:*

Trivalent cation-induced phase separation in proteins: ion specific  
contribution in hydration also counts

Ria Saha and Rajib Kumar Mitra\*

### Zeta-potential ( $\zeta$ ) measurements

Zeta-potential ( $\zeta$ ) measurements by Nano S Malvern instrument are mainly based on the basic mean-field approach of the Poisson-Boltzmann (PB) theory. The ion distribution around the dispersed charged object creates an electrostatic double layer (EDL), which is a reason for charge screening in electrolyte solutions, over the Debye screening length.

The Debye Huckel parameter ( $\kappa$ ) in  $m^{-1}$  is first calculated by,<sup>1</sup>

$$\kappa = \sqrt{4\pi\lambda_B N_A \sum_i n_i Z_i^2} \quad (1)$$

with the Bjerrum length<sup>2</sup> in m,

$$\lambda_B = \frac{e^2}{4\pi\epsilon_0\epsilon_{H_2O}k_B T} \quad (2)$$

Here,  $i$ -th number of ionic species are accounted with  $Z_i$ , valences and  $n_i$ , number concentration.  $e$  is the elementary charge,  $k_B T$  denotes the product of Boltzmann constant and absolute temperature.  $\epsilon_0$  and  $\epsilon_{H_2O}$  are the vacuum dielectric permittivity and the total dielectric permittivity of water at the respective temperature.<sup>3</sup> The value of  $\epsilon_0$  and  $\epsilon_{H_2O}$  are taken  $8.85 \times 10^{-12} C^2 N^{-1} m^{-2}$  and 80, respectively.

Electrophoretic mobility  $\mu$  of the charged colloidal particle with spherical in shape towards the oppositely charged electrodes under an external electric field relates to the measured ZP  $\zeta$  by Henry's equation,<sup>4</sup>

$$\mu = \frac{2\epsilon_r\epsilon_0}{3\eta} \zeta f(\kappa a) \quad (3)$$

Where  $\eta$  is the viscosity of the medium and  $a$  is the radius of the spherical particle.

Here we have measured the ZP of BSA with  $a$  value of 3.3 nm. The default Henry function  $f(\kappa a) = 1.5$  used in Zetasizer settings, which does not show the distinct effect on the investigated systems. Therefore,  $f(\kappa a)$  can be calculated as given by Ohshima,<sup>5</sup>

$$f(\kappa a) = 1 + \frac{1}{2} \left[ 1 + \left( \frac{2.5}{\kappa a [1 + 2 \exp(-\kappa a)]} \right) \right]^{-3} \quad (4)$$

To get the corrected ZP ( $\zeta_{corr}$ ),  $\zeta$  for each system is multiplied by its corresponding calculated

$f(\kappa a)$  value. Then  $\zeta_{corr}$  is multiplying with  $\frac{e}{k_B T}$  to rescale it as to  $\zeta^*$ .<sup>6</sup>

The surface charge density of BSA protein,  $\sigma$  ( $C/m^2$ ), is obtained by,<sup>7</sup>

$$\sigma = \frac{\varepsilon_0 \varepsilon_{H_2O} \kappa k_B T}{e} \left( 2 \sinh\left(\frac{\zeta^*}{2}\right) + \left( \frac{4}{(\kappa a)} \tanh\left(\frac{\zeta^*}{4}\right) \right) \right) \quad (5)$$

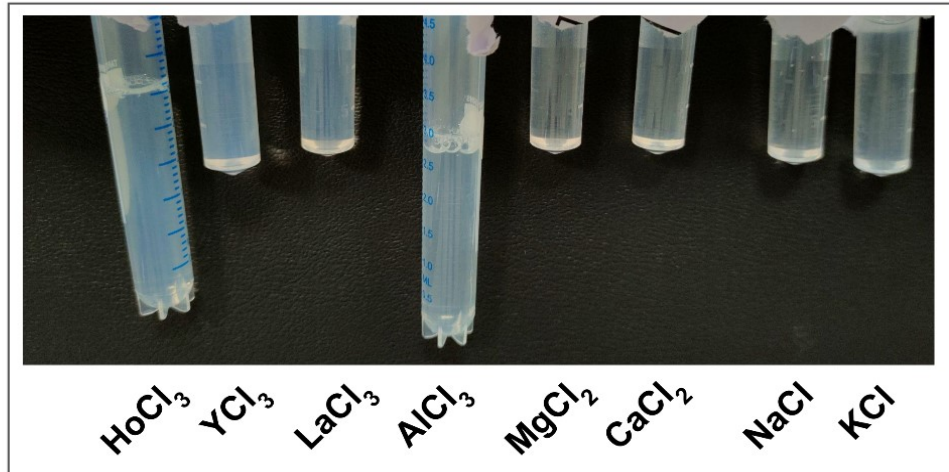

**Figure S1.** Images of different phase of samples, containing  $40 \text{ mg ml}^{-1}$  ( $0.6\text{mM}$ ) of BSA and Chloride salts with different valences. In every sample, the protein concentration ( $C_p$ ) is  $0.6\text{mM}$  and the salt concentration ( $C_s$ ) is  $14\text{mM}$  to maintain the  $C_s : C_p$  ratio of 23.33. Images show that the protein solutions get turbid in presence of trivalent salts compared to mono and divalent salts at room temperature.

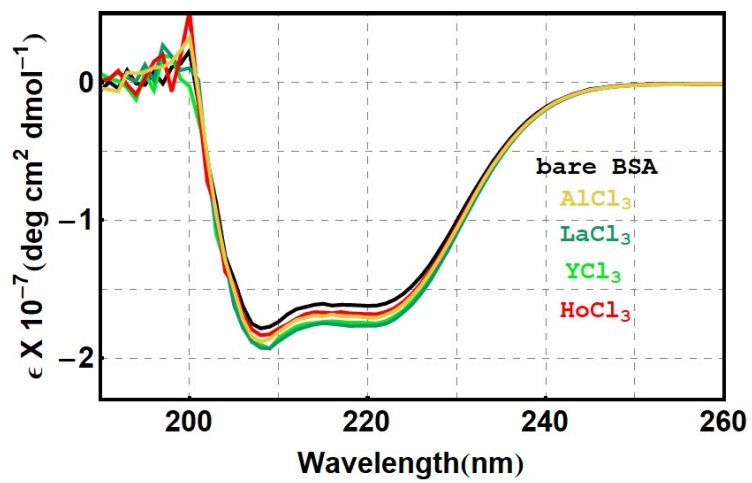

**Figure S2.** Representative CD signals (analysed in molar ellipticity,  $\epsilon$ ) of bare BSA protein, and in presence of the mentioned trivalent salts.

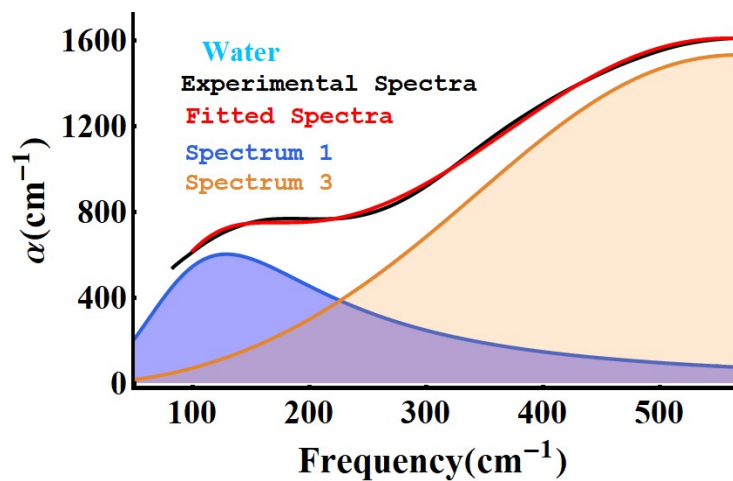

**Figure S3.** Deconvoluted frequency dependent absorption coefficient,  $\alpha(\nu)$  spectra of bulk water. Two damped modes are observed: HB stretching mode ( $\sim 129 \text{ cm}^{-1}$ ), and librational mode ( $\sim 569 \text{ cm}^{-1}$ )

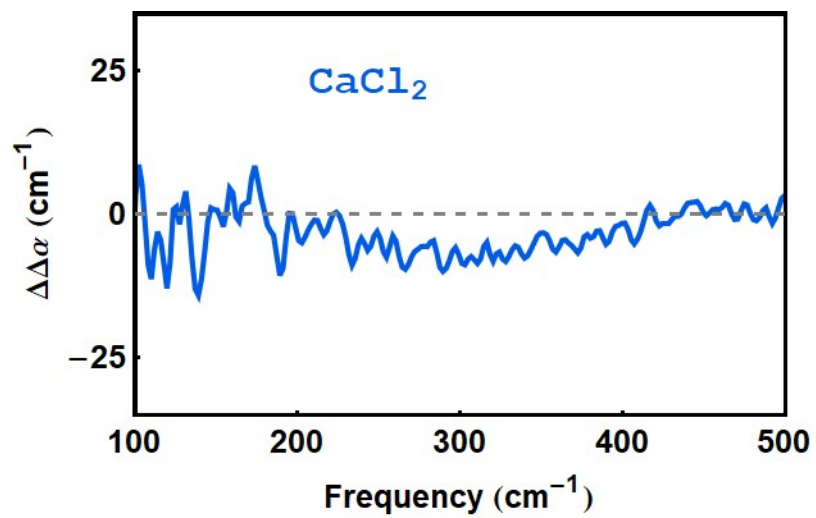

**Figure S4.** Frequency dependent change in difference absorption coefficients  $\Delta\Delta\alpha(\nu)$  ( $= \Delta\alpha_{p+s}(\nu) - \Delta\alpha_p(\nu)$ ) of  $\text{CaCl}_2$ .

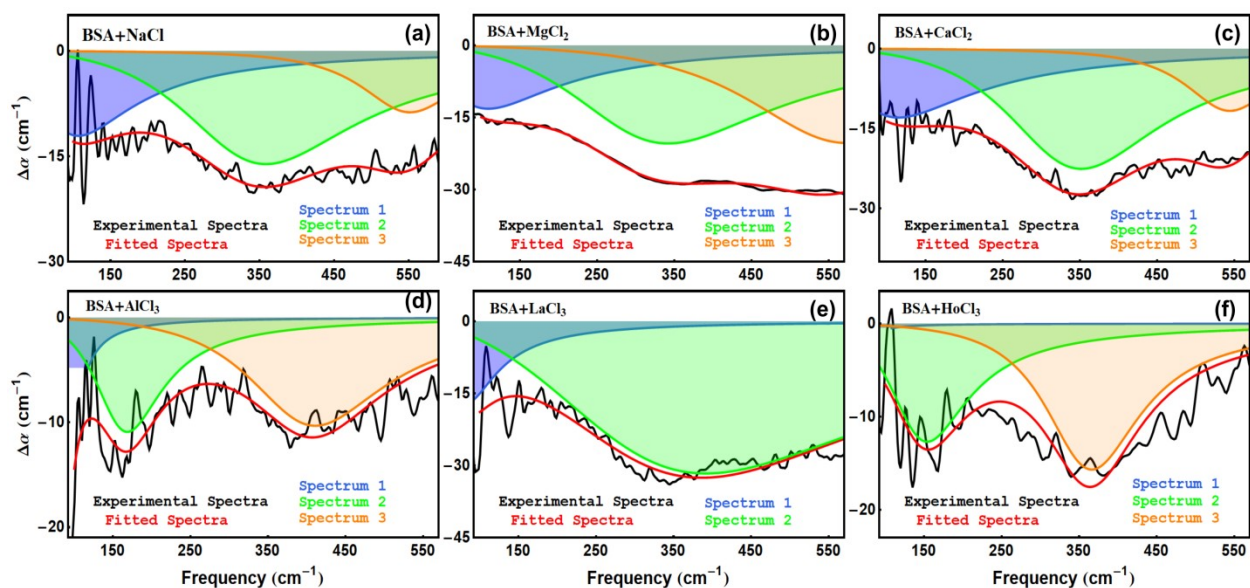

**Figure S5.** Dissection of experimental  $\Delta\alpha(\nu)$  spectra fitted using a damped harmonic oscillator model for (a) BSA-NaCl, (b) BSA-MgCl<sub>2</sub>, (c) BSA-CaCl<sub>2</sub>, (d) BSA-AlCl<sub>3</sub>, (e) BSA-LaCl<sub>3</sub>, and (f) BSA-HoCl<sub>3</sub> solutions. The black solid lines represent experimental data and the red lines stand for the overall fit. Three damped modes are observed: HB stretching mode (spectrum 1), rattling motion of ions (spectrum 2), and librational mode (spectrum 3).



**Table S1.** The listed values of the fitted parameters; amplitude ( $a_0$ ), damping width ( $\omega_0$ ), damped frequency ( $\nu_d$ ), and unperturbed center frequency ( $\nu_c$ ) : Respective values for hydrogen bond stretching mode, for rattling motions of ions, and for water librational motion of each protein-salt system and only aqueous solution of BSA protein.

| Salt                    | $a_0$ ( $\text{cm}^{-1}\text{dm}^3\text{mol}^{-1}$ ) | $\omega_0$ ( $\text{cm}^{-1}$ ) | $\nu_d$ ( $\text{cm}^{-1}$ ) | $\nu_c$ ( $\text{cm}^{-1}$ ) |
|-------------------------|------------------------------------------------------|---------------------------------|------------------------------|------------------------------|
| <b>HB stretch</b>       |                                                      |                                 |                              |                              |
| <b>0</b>                | -83811.5                                             | 444.6(57)                       | 16.7(55)                     | 72.7(56)                     |
| <b>NaCl</b>             | -77012.7                                             | 507.8(111)                      | 69.8(17)                     | 106.8(24)                    |
| <b>KCl</b>              | -127663.8                                            | 720(100)                        | 82(14)                       | 141(22)                      |
| <b>MgCl<sub>2</sub></b> | -98570                                               | 596.5(60)                       | 53.3(17)                     | 108.9(20)                    |
| <b>CaCl<sub>2</sub></b> | -104690.1                                            | 645(132)                        | 51.3(32)                     | 114.8(39)                    |
| <b>AlCl<sub>3</sub></b> | -27390.8                                             | 94.8(12)                        | 82.2(1)                      | 83.5(2)                      |
| <b>LaCl<sub>3</sub></b> | -58199.7                                             | 272.4(36)                       | 70.2(5)                      | 82.5(7)                      |
| <b>YCl<sub>3</sub></b>  | -21539.6                                             | 90.8(15)                        | 91.2(2)                      | 92.4(3)                      |
| <b>HoCl<sub>3</sub></b> | -19243.8                                             | 28.1(4)                         | 52.5(0.4)                    | 52.7(0.8)                    |
| <b>Ion rattling</b>     |                                                      |                                 |                              |                              |
| <b>0</b>                | -                                                    | -                               | -                            | -                            |
| <b>NaCl</b>             | -182736.1                                            | 903.9(183)                      | 328.5(10)                    | 358.6(31)                    |
| <b>KCl</b>              | -197652.5                                            | 942(154)                        | 374(7)                       | 403(26)                      |
| <b>MgCl<sub>2</sub></b> | -257425.9                                            | 1005.5(53)                      | 302.1(4)                     | 341.9(9)                     |
| <b>CaCl<sub>2</sub></b> | -220001.4                                            | 776.6(86)                       | 329.4(6)                     | 351.8(15)                    |
| <b>AlCl<sub>3</sub></b> | -45848.9                                             | 334.4(56)                       | 159.8(6)                     | 168.5(11)                    |
| <b>LaCl<sub>3</sub></b> | -668883.5                                            | 1683(55)                        | 286(11)                      | 391.8(14)                    |
| <b>YCl<sub>3</sub></b>  | -730030.6                                            | 1871.7(72)                      | 244(15)                      | 385 (19)                     |
| <b>HoCl<sub>3</sub></b> | -59994.3                                             | 376.2(71)                       | 142.5(7)                     | 154.5(13)                    |
| <b>Water libration</b>  |                                                      |                                 |                              |                              |
| <b>0</b>                | -446439.3                                            | 1827.9(100)                     | 374.3(16)                    | 474.1(23)                    |
| <b>NaCl</b>             | -56641.7                                             | 517.1(140)                      | 545.6(10)                    | 551.7(25)                    |
| <b>KCl</b>              | -68296                                               | 541.8(99)                       | 571.3(7)                     | 577.7(17)                    |
| <b>MgCl<sub>2</sub></b> | -263277.8                                            | 1033(27)                        | 550(3)                       | 574.1(5)                     |
| <b>CaCl<sub>2</sub></b> | -66210.2                                             | 452(64)                         | 539.6(5)                     | 544.3(11)                    |
| <b>AlCl<sub>3</sub></b> | -88089                                               | 678.8(65)                       | 396.5(8)                     | 410.9(13)                    |
| <b>LaCl<sub>3</sub></b> | -                                                    | -                               | -                            | -                            |
| <b>YCl<sub>3</sub></b>  | -                                                    | -                               | -                            | -                            |
| <b>HoCl<sub>3</sub></b> | -93958.5                                             | 474.2(52)                       | 358(6)                       | 365.8(10)                    |

**Table S2.**

| <b>System</b>    | $\Delta\Delta\alpha(\nu)$            | $\Delta S_{hyd}$ | <b>Hydration geometry</b>                | <b>Remarks</b>                                                                            |
|------------------|--------------------------------------|------------------|------------------------------------------|-------------------------------------------------------------------------------------------|
| Ho <sup>3+</sup> | almost zero<br>or<br>nearly positive | positive         | square antiprismatic<br>(8 co-ordinated) | Red shift of the ion rattling mode<br>Weak hydration water exchange                       |
| Al <sup>3+</sup> | Distinctly positive                  | positive         | octahedrally co-ordinated                | Red shift of the ion rattling mode.<br>Major desolvation of octahedrally co-ordinated ion |

## References

1. A. V. Delgado, F. González-Caballero, R. J. Hunter, L. K. Koopal and J. Lyklema, *J. Colloid Interface Sci.*, 2007, **309**, 194-224.
2. J. N. Israelachvili, *Intermolecular and surface forces*, Academic press, London, 2011.
3. B. B. Owen, R. C. Miller, C. E. Milner and H. L. Cogan, *J. Phys. Chem.*, 1961, **65**, 2065-2070.
4. S. Bhattacharjee, *J Control Release.*, 2016, **235**, 337-351.
5. H. Ohshima, *J. Colloid Interface Sci.*, 1994, **168**, 269-271.
6. O. Matsarskaia, F. Roosen-Runge, G. Lotze, J. Möller, A. Mariani, F. Zhang and F. Schreiber, *Phys. Chem. Chem. Phys.*, 2018, **20**, 27214-27225.
7. H. Ohshima, T. W. Healy and L. R. White, *J. Colloid Interface Sci.*, 1982, **90**, 17-26.
